# Supplementary material for: The stagnation paradox: the ever-improving but (more or less) stationary population fitness
Source: PubMed Central journal article supplement (PMC8596016; doi:10.1098/rspb.2021.2145), 2021-11-24
Supplement: rspb20212145_review_history.pdf [file rspb20212145_review_history.pdf]

## The stagnation paradox: the ever-improving but (more or less) stationary population fitness

Hanna Kokko

### Article citation details

*Proc. R. Soc. B* **288**: 20212145.

<http://dx.doi.org/10.1098/rspb.2021.2145>

### Review timeline

Original submission: 28 September 2021

Revised submission: 21 October 2021

Final acceptance: 22 October 2021

Note: Reports are unedited and appear as submitted by the referee. The review history appears in chronological order.

## Review History

### RSPB-2021-2145.R0 (Original submission)

#### Review form: Reviewer 1

##### Recommendation

Accept as is

##### Scientific importance: Is the manuscript an original and important contribution to its field?

Excellent

##### General interest: Is the paper of sufficient general interest?

Excellent

##### Quality of the paper: Is the overall quality of the paper suitable?

Excellent

##### Is the length of the paper justified?

Yes

##### Should the paper be seen by a specialist statistical reviewer?

No

**Do you have any concerns about statistical analyses in this paper? If so, please specify them explicitly in your report.**

No

**It is a condition of publication that authors make their supporting data, code and materials available - either as supplementary material or hosted in an external repository. Please rate, if applicable, the supporting data on the following criteria.**

**Is it accessible?**

N/A

**Is it clear?**

N/A

**Is it adequate?**

N/A

**Do you have any ethical concerns with this paper?**

No

### **Comments to the Author**

This manuscript gives a great overview of the links between adaptation, competition, population fitness and the fundamental theorem of natural selection. Some of these points are incredibly important for lots of theoretical and empirical questions, and are generally presented in some form in undergraduate teaching, yet not fully grasped by a large portion of empiricists.

Hammering them again, in a very clear format, as this manuscript does has the potential to have a broad impact on the quality of ecology and evolution research. At the very least this manuscript should prevent some researchers from having to rediscover the same 91 years old results.

I think I agree with every statement, and I really like the casual and clear writing style. Arguably one could expand this manuscript to be a few hundred pages long to include all the relevant research and nuanced points of view, but the current treatment appears sufficient and very helpful as it is.

## typos?

L. 128. "caster" -&gt; "faster" ? (or did I miss a baking metaphor?)

L.422 "is be" -&gt; "is" ?

## **Review form: Reviewer 2**

### **Recommendation**

Accept with minor revision (please list in comments)

**Scientific importance: Is the manuscript an original and important contribution to its field?**

Excellent

**General interest: Is the paper of sufficient general interest?**

Excellent

**Quality of the paper: Is the overall quality of the paper suitable?**

Good

**Is the length of the paper justified?**

Yes

**Should the paper be seen by a specialist statistical reviewer?**

No

**Do you have any concerns about statistical analyses in this paper? If so, please specify them explicitly in your report.**

No

**It is a condition of publication that authors make their supporting data, code and materials available - either as supplementary material or hosted in an external repository. Please rate, if applicable, the supporting data on the following criteria.**

**Is it accessible?**

N/A

**Is it clear?**

N/A

**Is it adequate?**

N/A

**Do you have any ethical concerns with this paper?**

Yes

#### **Comments to the Author**

In this Darwin Review, Hanna Kokko discusses the so-called stagnation paradox: how can mean fitness improve by natural selection and yet stay constant? I really enjoyed reading the paper. The text is readable and insightful. I think the argument is important, the author does a nice job laying it out.

My comments are minor and focus on the few instances where I found the presentation to be less lucid.

#### **ABSTRACT**

Lines 9-10, "Fitness, in turn, is equated with population growth" change to "can be" or "is often"?

Lines 21-22, "Even so, the jury is still out regarding the effect of sexual conflict on population fitness". This sentence does not come naturally from the previous one

#### **INTRODUCTION**

Lines 27-29, This a long opening sentence, especially as it is written in a passive voice.

Line 50, I think it would be good to clarify who is equating mean fitness with growth rate

Lines 60-64, Would it be worth it to explain link (or lack thereof) between the stagnation paradox and the Eldredge and Gould's "stasis is data" slogan somewhere in the Introduction?

#### **FITNESS IN THE LONG-TERM EVOLUTION EXPERIMENT (LTEE)**

Line 89 Delete "of"

Line 97, I found the reference to [10]'s use of B and A to be distracting.

Lines 115-123, I think these three scenarios would make for a nice figure

## SERIAL REDISCOVERY

Line 191, I think it be good to spell out W' | E' - W | E verbally

## A BRIEF CONCLUSION

Lines 435-444, I like the analogy of the history of evolutionary theory as a tree with multiple branches. I feel, however, that it feels more like the premise rather the conclusion of the paper. Move to Introduction?

## Decision letter (RSPB-2021-2145.R0)

19-Oct-2021

Dear Hanna

I am pleased to inform you that your manuscript RSPB-2021-2145 entitled "The stagnation paradox: the ever-improving but (more or less) stationary population fitness" has been accepted for publication in Proceedings B... well of course it has!

As you will see, both referees are very enthusiastic about your review, as am I, but they have made some useful suggestions to make it EVEN better. Therefore, I invite you to respond to the referees' comments and revise your manuscript. Because the schedule for publication is very tight, it is a condition of publication that you submit the revised version of your manuscript within 7 days. If you do not think you will be able to meet this date please let us know.

To revise your manuscript, log into <https://mc.manuscriptcentral.com/prsb> and enter your Author Centre, where you will find your manuscript title listed under "Manuscripts with Decisions." Under "Actions," click on "Create a Revision." Your manuscript number has been appended to denote a revision. You will be unable to make your revisions on the originally submitted version of the manuscript. Instead, revise your manuscript and upload a new version through your Author Centre.

When submitting your revised manuscript, you will be able to respond to the comments made by the referee(s) and upload a file "Response to Referees". You can use this to document any changes you make to the original manuscript. We require a copy of the manuscript with revisions made since the previous version marked as 'tracked changes' to be included in the 'response to referees' document.

Before uploading your revised files please make sure that you have:

- 1) A text file of the manuscript (doc, txt, rtf or tex), including the references, tables (including captions) and figure captions. Please remove any tracked changes from the text before submission. PDF files are not an accepted format for the "Main Document".
- 2) A separate electronic file of each figure (tiff, EPS or print-quality PDF preferred). The format should be produced directly from original creation package, or original software format. PowerPoint files are not accepted.
- 3) Electronic supplementary material: this should be contained in a separate file and where possible, all ESM should be combined into a single file. All supplementary materials accompanying an accepted article will be treated as in their final form. They will be published alongside the paper on the journal website and posted on the online figshare repository. Files on figshare will be made available approximately one week before the accompanying article so that the supplementary material can be attributed a unique DOI.

Online supplementary material will also carry the title and description provided during submission, so please ensure these are accurate and informative. Note that the Royal Society will not edit or typeset supplementary material and it will be hosted as provided. Please ensure that the supplementary material includes the paper details (authors, title, journal name, article DOI). Your article DOI will be 10.1098/rspb.[paper ID in form xxxx.xxxx e.g. 10.1098/rspb.2016.0049].

4) A media summary: a short non-technical summary (up to 100 words) of the key findings/importance of your manuscript.

5) Data accessibility section and data citation

It is a condition of publication that data supporting your paper are made available either in the electronic supplementary material or through an appropriate repository (<https://royalsociety.org/journals/authors/author-guidelines/#data>).

In order to ensure effective and robust dissemination and appropriate credit to authors the dataset(s) used should be fully cited. To ensure archived data are available to readers, authors should include a 'data accessibility' section immediately after the acknowledgements section. This should list the database and accession number for all data from the article that has been made publicly available, for instance:

- DNA sequences: Genbank accessions F234391-F234402
- Phylogenetic data: TreeBASE accession number S9123
- Final DNA sequence assembly uploaded as online supplemental material
- Climate data and MaxEnt input files: Dryad doi:10.5521/dryad.12311

NB. From April 1 2013, peer reviewed articles based on research funded wholly or partly by RCUK must include, if applicable, a statement on how the underlying research materials – such as data, samples or models – can be accessed. This statement should be included in the data accessibility section.

If you wish to submit your data to Dryad (<http://datadryad.org/>) and have not already done so you can submit your data via this link

[http://datadryad.org/submit?journalID=RSPB&manu=\(Document not available\)](http://datadryad.org/submit?journalID=RSPB&manu=(Document not available)) which will take you to your unique entry in the Dryad repository. If you have already submitted your data to dryad you can make any necessary revisions to your dataset by following the above link. Please see <https://royalsociety.org/journals/ethics-policies/data-sharing-mining/> for more details.

6) For more information on our Licence to Publish, Open Access, Cover images and Media summaries, please visit <https://royalsociety.org/journals/authors/author-guidelines/>.

Once again, thank you for submitting your manuscript to Proceedings B and I look forward to receiving your revision. If you have any questions at all, please do not hesitate to get in touch.

Very best wishes, and thanks again for an outstanding review,

Innes  
Professor Innes Cuthill  
Reviews Editor, Proceedings B  
mailto: [proceedingsb@royalsociety.org](mailto:proceedingsb@royalsociety.org)

Reviewer(s)' Comments to Author:

Referee: 1

Comments to the Author(s)

This manuscript gives a great overview of the links between adaptation, competition, population fitness and the fundamental theorem of natural selection. Some of these points are incredibly important for lots of theoretical and empirical questions, and are generally presented in some

form in undergraduate teaching, yet not fully grasped by a large portion of empiricists. Hammering them again, in a very clear format, as this manuscript does has the potential to have a broad impact on the quality of ecology and evolution research. At the very least this manuscript should prevent some researchers from having to rediscover the same 91 years old results. I think I agree with every statement, and I really like the casual and clear writing style. Arguably one could expand this manuscript to be a few hundred pages long to include all the relevant research and nuanced points of view, but the current treatment appears sufficient and very helpful as it is.

## typos?

L. 128. "caster" -&gt; "faster" ? (or did I miss a baking metaphor?)

L.422 "is be" -&gt; "is" ?

Referee: 2

Comments to the Author(s)

In this Darwin Review, Hanna Kokko discusses the so-called stagnation paradox: how can mean fitness improve by natural selection and yet stay constant? I really enjoyed reading the paper. The text is readable and insightful. I think the argument is important, the author does a nice job laying it out.

My comments are minor and focus on the few instances where I found the presentation to be less lucid.

ABSTRACT

Lines 9-10, "Fitness, in turn, is equated with population growth" change to "can be" or "is often"?

Lines 21-22, "Even so, the jury is still out regarding the effect of sexual conflict on population fitness". This sentence does not come naturally from the previous one

INTRODUCTION

Lines 27-29, This a long opening sentence, especially as it is written in a passive voice.

Line 50, I think it would be good to clarify who is equating mean fitness with growth rate

Lines 60-64, Would it be worth it to explain link (or lack thereof) between the stagnation paradox and the Eldredge and Gould's "stasis is data" slogan somewhere in the Introduction?

FITNESS IN THE LONG-TERM EVOLUTION EXPERIMENT (LTEE)

Line 89 Delete "of"

Line 97, I found the reference to [10]'s use of B and A to be distracting.

Lines 115-123, I think these three scenarios would make for a nice figure

SERIAL REDISCOVERY

Line 191, I think it be good to spell out  $W' | E' - W | E$  verbally

A BRIEF CONCLUSION

Lines 435-444, I like the analogy of the history of evolutionary theory as a tree with multiple branches. I feel, however, that it feels more like the premise rather the conclusion of the paper. Move to Introduction?

## Author's Response to Decision Letter for (RSPB-2021-2145.R0)

See Appendix A.

### Decision letter (RSPB-2021-2145.R1)

22-Oct-2021

Dear Dr Kokko

I am pleased to inform you that your manuscript entitled "The stagnation paradox: the ever-improving but (more or less) stationary population fitness" has been accepted for publication in Proceedings B.

You can expect to receive a proof of your article from our Production office in due course, please check your spam filter if you do not receive it. PLEASE NOTE: you will be given the exact page length of your paper which may be different from the estimation from Editorial and you may be asked to reduce your paper if it goes over the 10 page limit.

If you are likely to be away from e-mail contact please let us know. Due to rapid publication and an extremely tight schedule, if comments are not received, we may publish the paper as it stands.

If you have any queries regarding the production of your final article or the publication date please contact [procb\\_proofs@royalsociety.org](mailto:procb_proofs@royalsociety.org)

Your article has been estimated as being 10 pages long. Our Production Office will be able to confirm the exact length at proof stage.

#### Data Accessibility section

Please remember to make any data sets live prior to publication, and update any links as needed when you receive a proof to check. It is good practice to also add data sets to your reference list.

#### Open Access

You are invited to opt for Open Access, making your freely available to all as soon as it is ready for publication under a CC BY licence. Our article processing charge for Open Access is £1700.

Corresponding authors from member institutions

(<http://royalsocietypublishing.org/site/librarians/allmembers.xhtml>) receive a 25% discount to these charges. For more information please visit <http://royalsocietypublishing.org/open-access>.

#### Paper charges

An e-mail request for payment of any related charges will be sent out shortly. The preferred payment method is by credit card; however, other payment options are available.

#### Electronic supplementary material:

All supplementary materials accompanying an accepted article will be treated as in their final form. They will be published alongside the paper on the journal website and posted on the online figshare repository. Files on figshare will be made available approximately one week before the accompanying article so that the supplementary material can be attributed a unique DOI.

You are allowed to post any version of your manuscript on a personal website, repository or preprint server. However, the work remains under media embargo and you should not discuss it

with the press until the date of publication. Please visit <https://royalsociety.org/journals/ethics-policies/media-embargo> for more information.

Thank you for your fine contribution. On behalf of the Editors of the Proceedings B, we look forward to your continued contributions to the Journal.

Sincerely,  
Proceedings B  
<mailto:proceedingsb@royalsociety.org>



# Appendix A

Dear Innes

Thank you, that was quite a set of reviews – rarely are they so positive!

I'd like to apologize for taking up so few of reviewer 2's suggestions, many of them made sense but then were not so easy to implement after all (see below). Below are all my responses:

L. 128. "caster" -> "faster" ? (or did I miss a baking metaphor?)

*Indeed, no baking metaphor was intended...*

L.422 "is be" -> "is" ?

*Thanks for spotting this typo! Corrected.*

Referee: 2

## ABSTRACT

Lines 9-10, "Fitness, in turn, is equated with population growth" change to "can be" or "is often"?

*'often' added.*

Lines 21-22, "Even so, the jury is still out regarding the effect of sexual conflict on population fitness". This sentence does not come naturally from the previous one

*I reflected on this and I actually think it does come naturally – though it perhaps requires thinking about the preceding 2 sentences not just 1. (The gist is: Adaptation can lead to declining population fitness; particularly so when we think about males; but males aren't always a negative force.) I tried to think how to make this clearer, but in the end gave up.*

## INTRODUCTION

Lines 27-29, This a long opening sentence, especially as it is written in a passive voice.

*I shortened it somewhat ('current views acknowledging' removed).*

Line 50, I think it would be good to clarify who is equating mean fitness with growth rate

*I now cite a few papers here (there are plenty to choose from, these are just examples).*

Lines 60-64, Would it be worth it to explain link (or lack thereof) between the stagnation paradox and the Eldredge and Gould's "stasis is data" slogan somewhere in the Introduction?

*I spent some time thinking about it, but I believe this macroevolutionary angle would distract more than it would illuminate in that context. I end the last paragraph of the main text with a mention of macroevolution, and perhaps it's best to stop there.*

## FITNESS IN THE LONG-TERM EVOLUTION EXPERIMENT (LTEE)

Line 89 Delete "of"

*Done.*

Line 97, I found the reference to [10]'s use of B and A to be distracting.

*Indeed, I reformulated.*

Lines 115-123, I think these three scenarios would make for a nice figure

*This is somewhat true – and I even drew them, but then ended up thinking that they failed to really capture the essence of the argument, which is the way that A' reverts back to zero growth (fitness 1). It was difficult to graph that without lots of explanation, and in the end I decided that it's better explained in the text this time, than in figures.*

## SERIAL REDISCOVERY

Line 191, I think it be good to spell out W|E' – W|E verbally

*I agree, yet when I tried, I ended up simply replicating the Triassic argument when I tried to keep it simple and intuitive – and that already comes in the next sentence. Alternatively, one could say these to be population fitnesses at two different*

*timepoints, but then I would contradict myself with elsewhere in the MS because I say that many different contrasts could be made! I wrestled with this a little and then ended up not changing the current structure.*

#### A BRIEF CONCLUSION

Lines 435-444, I like the analogy of the history of evolutionary theory as a tree with multiple branches. I feel, however, that it feels more like the premise rather the conclusion of the paper. Move to Introduction?

*Again, I considered doing this but then the paper ended too abruptly with a criticism of one particular paper. I did not really want to extend it artificially, so in the end I left the ending as is.*
